# Supplementary material for: GC-TOF-MS-Based Non-Targeted Metabolomic Analysis of Differential Metabolites in Chinese Ultra-Long-Term Industrially Fermented Kohlrabi and Their Associated Metabolic Pathways
Source: MDPI journal article supplement (doi:10.3390/metabo12100991), 2022-10-19
Supplement: s1 [file s1]

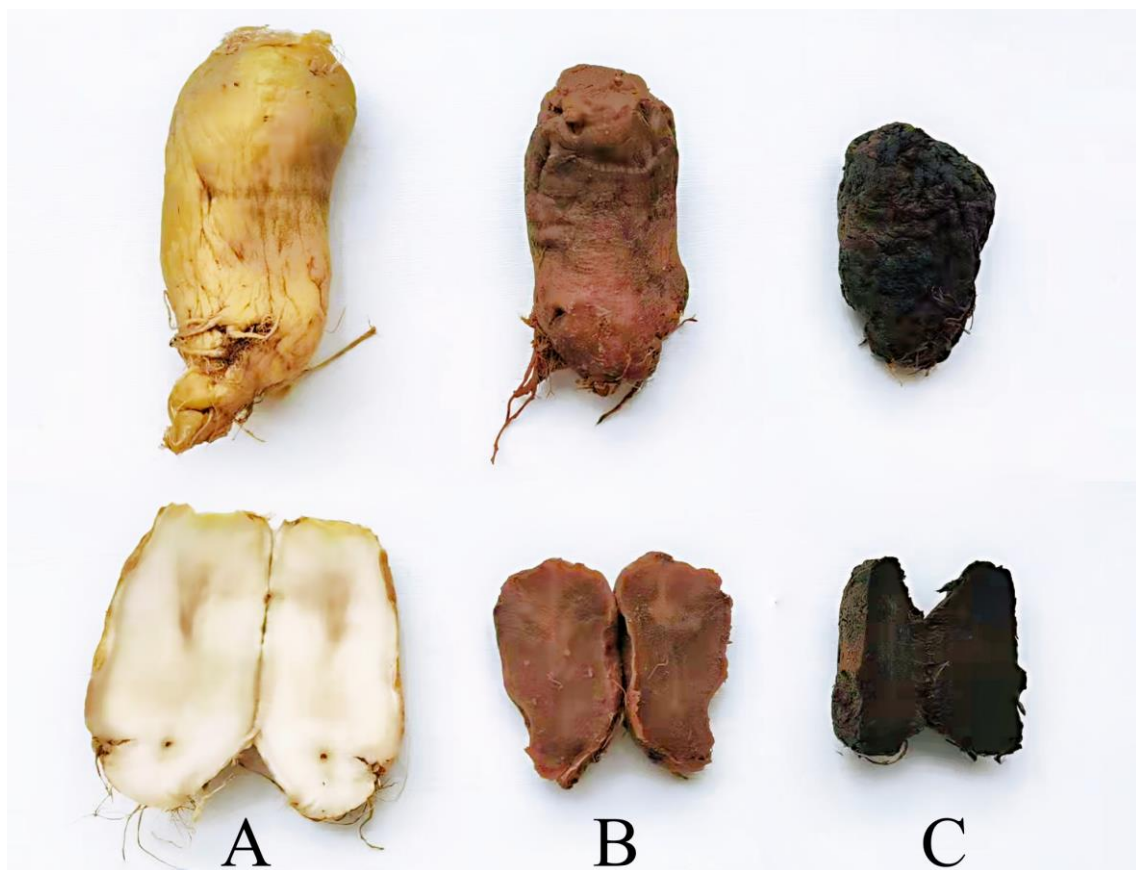

**Figure S1.** The appearance of the Chinese fermented kohlrabi, A, B and C respectively indicated 0Y, 5Y and 10Y fermented kohlrabi.

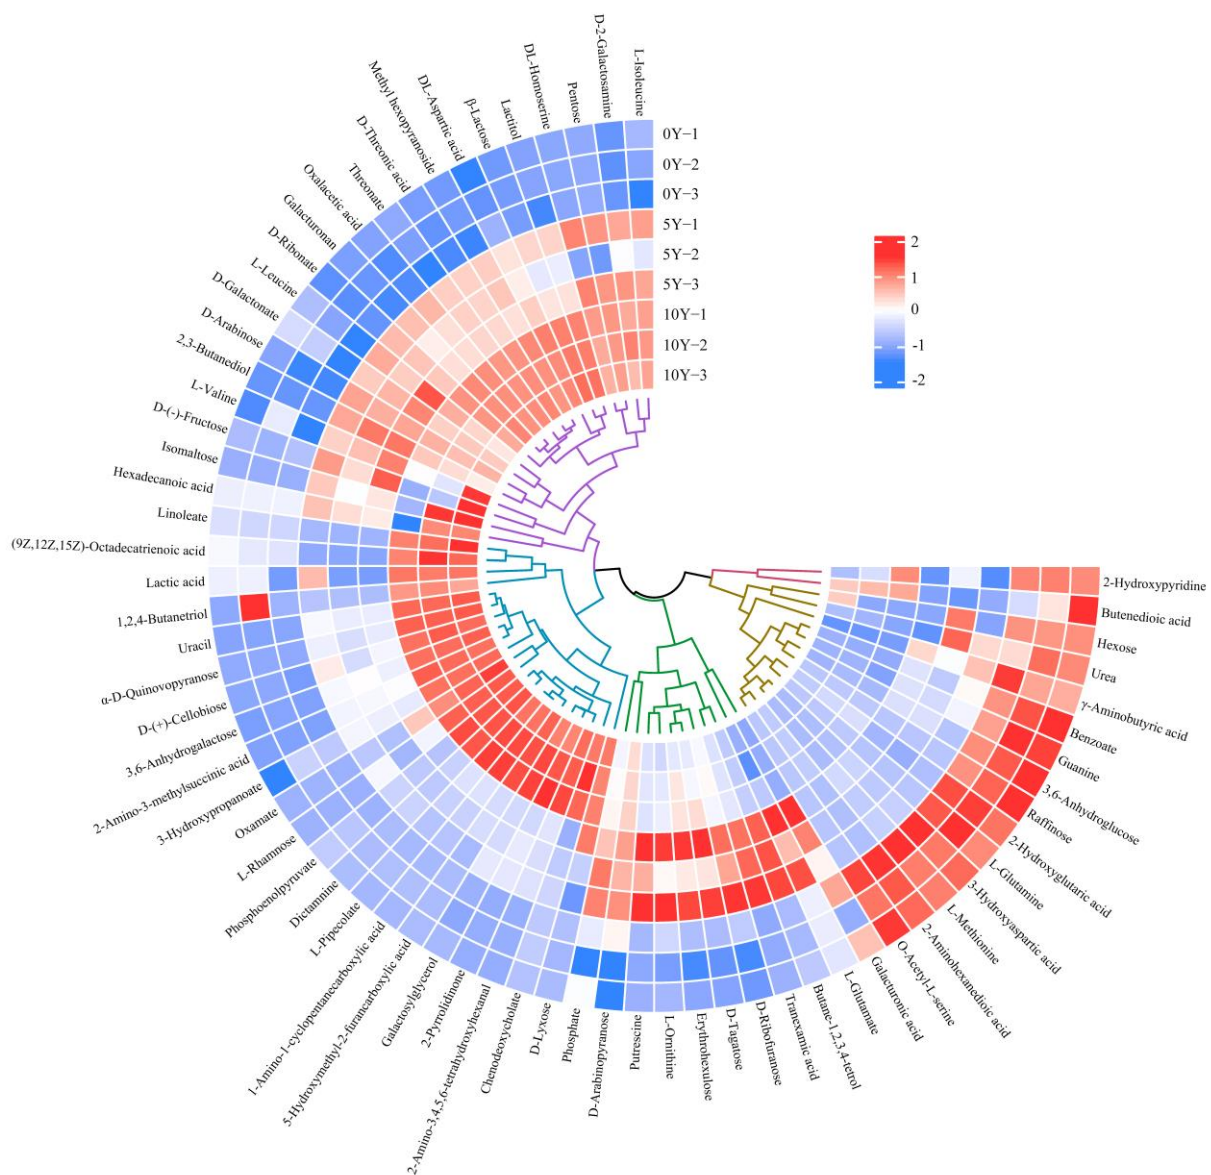

**Figure S2.** Clustering heat map of differential metabolites of industrial fermented kohlrabi with different ultra-long-terms fermentation.
